# Supplementary material for: One-step hydroxylation of benzene to phenol over Schiff base complexes incorporated onto mesoporous organosilica in the presence of different axial ligands
Source: Royal Society of Chemistry journal article supplement (doi:10.1039/d0nj00928h), 2020-01-01
Supplement: d0nj00928h1.pdf [file d0nj00928h1.pdf]

**One-step hydroxylation of benzene to phenol over Schiff base complexes incorporated onto  
the mesoporous organosilica in the presence of different axial ligands**

Shohreh Farahmand<sup>a</sup>, Mehran Ghiaci<sup>a\*</sup>, Morteza Vatanparast<sup>b</sup>, Jalal. S. Razavizadeh<sup>a</sup>

<sup>a</sup>Department of Chemistry, Isfahan University of Technology, Isfahan, Iran

<sup>b</sup>Department of Chemistry, Amirkabir University of Technology, Tehran Polytechnic, Tehran, Iran

**Supporting Information**

---

\*Corresponding author. Tel.: (+98)-31-3391 3254; Fax: (+98)-31-3391 2350.  
E-mail address: [mghiaci@cc.iut.ac.ir](mailto:mghiaci@cc.iut.ac.ir) (M. Ghiaci).

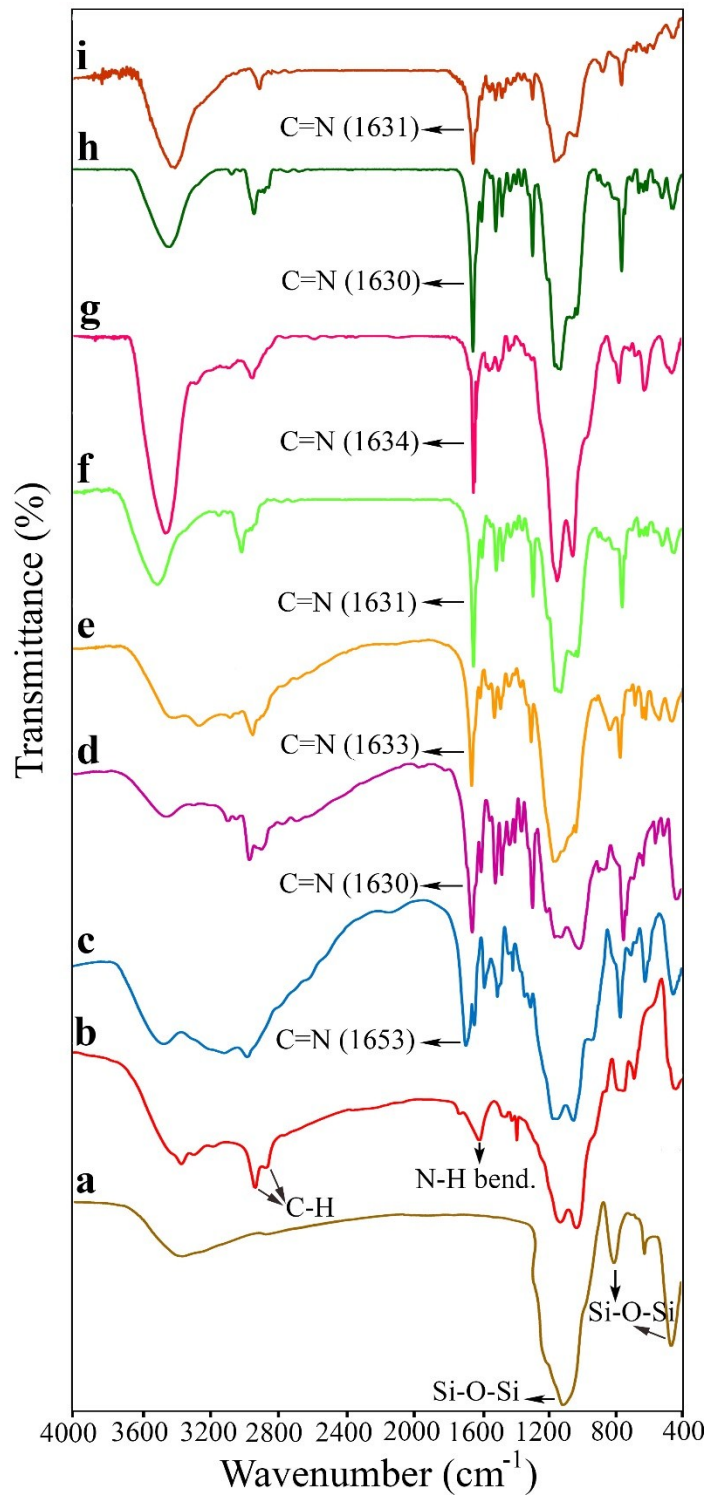

**Fig. 1S.** Fourier-transform infrared spectra of  $\text{SiO}_2$  (a),  $\text{SiO}_2\text{-NH}_2$  (b),  $\text{SiO}_2\text{-Pro-Sal}$  (c),  $\text{SiO}_2\text{-Pro-Sal-VO}$  (d),  $\text{SiO}_2\text{-Pro-Sal-Co}$  (e),  $\text{SiO}_2\text{-Pro-Sal-Cu}$  (f),  $\text{SiO}_2\text{-Pro-Sal-Fe}$  (g),  $\text{SiO}_2\text{-Pro-Sal-Zn}$  (h),  $\text{SiO}_2\text{-Pro-Sal-Mn}$  (i)

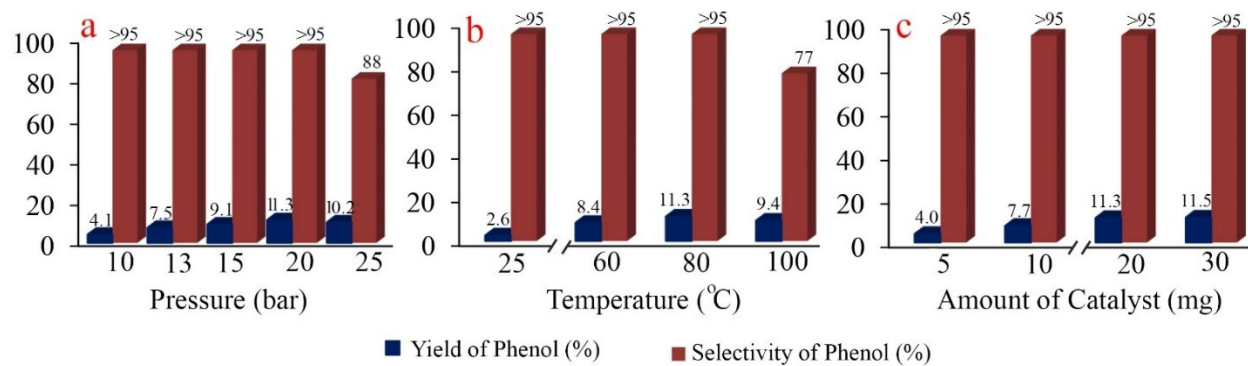

**Fig. 2S.** Effect of pressure of oxygen (a), temperature of reaction (b), and amount of catalyst (c) on the yield of phenol

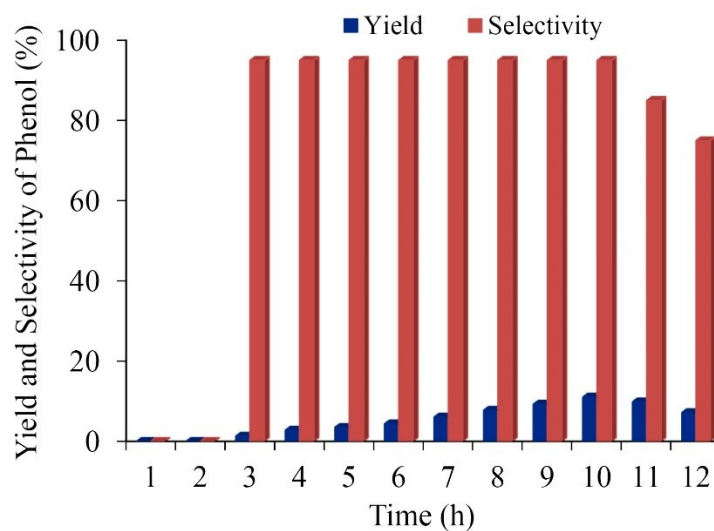

**Fig. 3S.** Diagram of the yield and selectivity of phenol over increasing time of reaction under optimized conditions

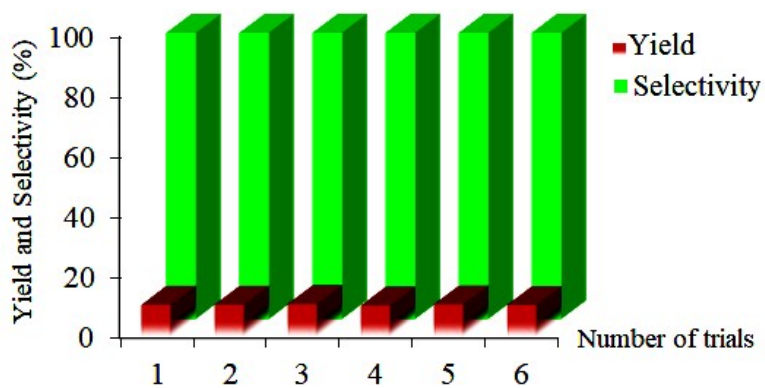

**Fig. 4S.** Diagram of the reusability of the SiO<sub>2</sub>-Pro-Sal-VO catalyst

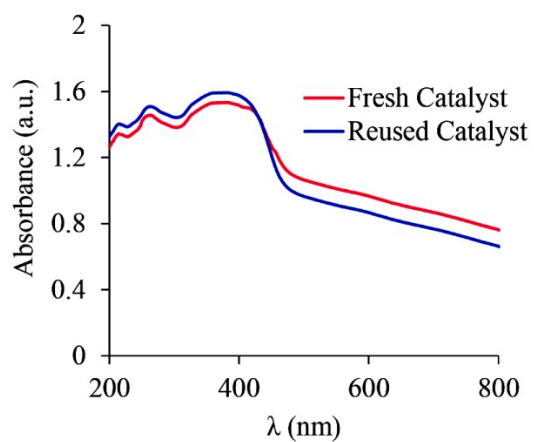

**Fig. 5S.** DRS patterns of fresh and reused catalysts
